# Supplementary material for: Computational inference of a genomic pluripotency signature in human and mouse stem cells
Source: PubMed Central journal article supplement (PMC5027095; doi:10.1186/s13062-016-0148-z), 2016-09-17

**A** Selected hESC datasets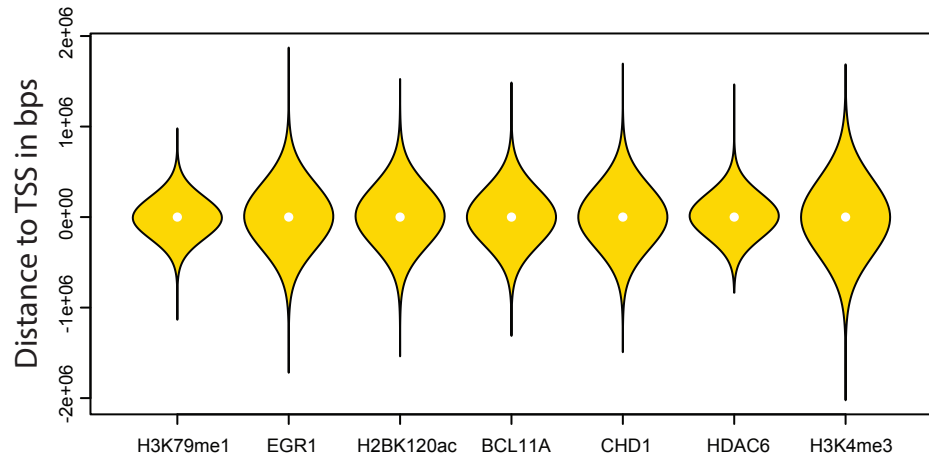**B** Selected mESC datasets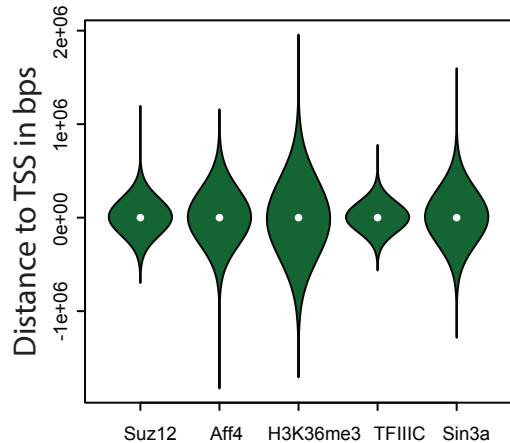

Supplement: 13062_2016_148_MOESM2_ESM.pdf [file 13062_2016_148_MOESM2_ESM.pdf]
