# Supplementary material for: Computational inference of a genomic pluripotency signature in human and mouse stem cells
Source: PubMed Central journal article supplement (PMC5027095; doi:10.1186/s13062-016-0148-z), 2016-09-17

**A** Predictive ability in human ESCs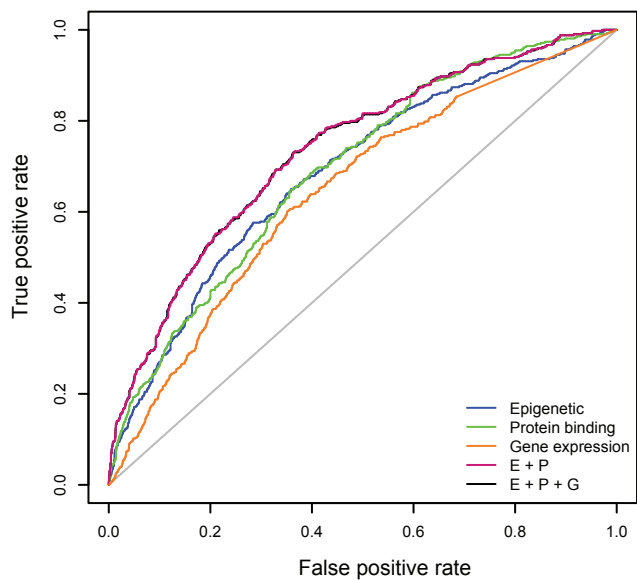**B** Predictive ability in mouse ESCs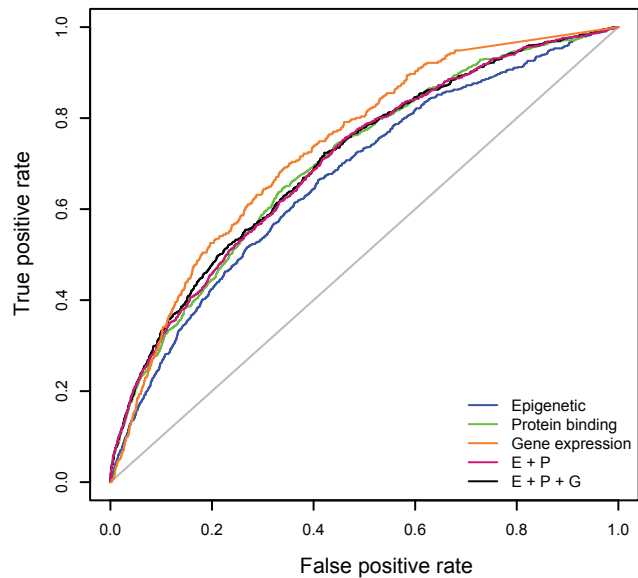**C** Predictive ability in human ESCs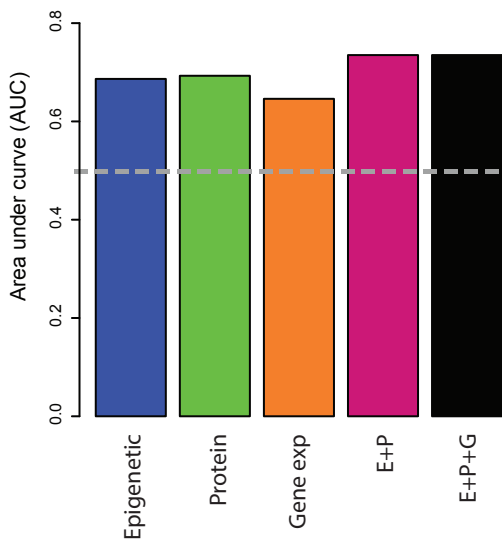**D** Predictive ability in mouse ESCs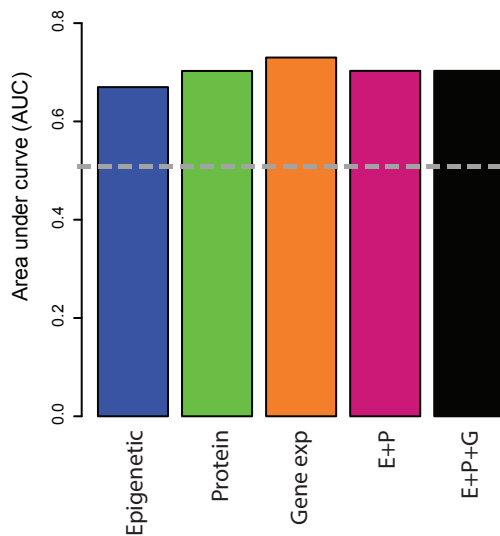

Supplement: 13062_2016_148_MOESM6_ESM.pdf [file 13062_2016_148_MOESM6_ESM.pdf]
