# Supplementary material for: Computational inference of a genomic pluripotency signature in human and mouse stem cells
Source: PubMed Central journal article supplement (PMC5027095; doi:10.1186/s13062-016-0148-z), 2016-09-17

### A GSEA for predicted genes in hESCs

| Gene Set                   | FDR<br>q-value | FWER<br>q-value |
|----------------------------|----------------|-----------------|
| MYC_TARGETS_V1             | 0.032          | 0.032           |
| MTORC1_SIGNALING           | 0.027          | 0.052           |
| E2F_TARGETS                | 0.024          | 0.072           |
| MITOTIC_SPINDLE            | 0.033          | 0.127           |
| MYC_TARGETS_V2             | 0.027          | 0.13            |
| WNT_BETA_CATENIN_SIGNALING | 0.022          | 0.132           |
| G2M_CHECKPOINT             | 0.019          | 0.132           |
| NOTCH_SIGNALING            | 0.018          | 0.135           |
| UNFOLDED_PROTEIN_RESPONSE  | 0.030          | 0.236           |
| PROTEIN_SECRETION          | 0.029          | 0.258           |
| TGF_BETA_SIGNALING         | 0.033          | 0.316           |
| TNFA_SIGNALING_VIA_NFKB    | 0.042          | 0.404           |

### B GSEA results for MYC target gene list

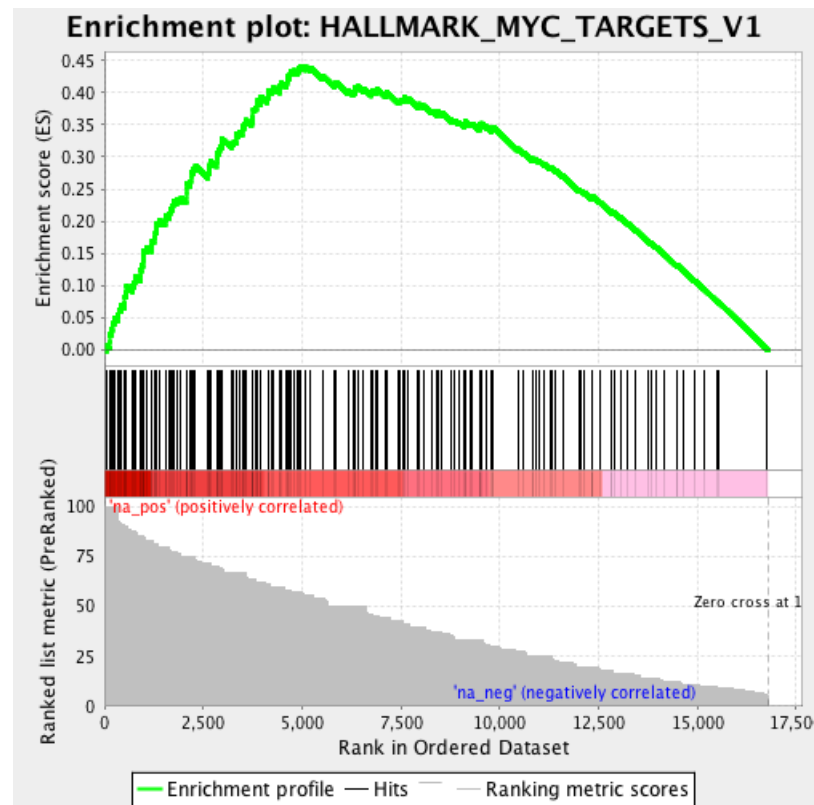

Supplement: 13062_2016_148_MOESM7_ESM.pdf [file 13062_2016_148_MOESM7_ESM.pdf]
