# Supplementary material for: Computational inference of a genomic pluripotency signature in human and mouse stem cells
Source: Biol Direct. 2016 Sep 17;11:47. doi: 10.1186/s13062-016-0148-z (PMC5027095; doi:10.1186/s13062-016-0148-z)

**A** Epigenetic data feature correlations (hESCs)

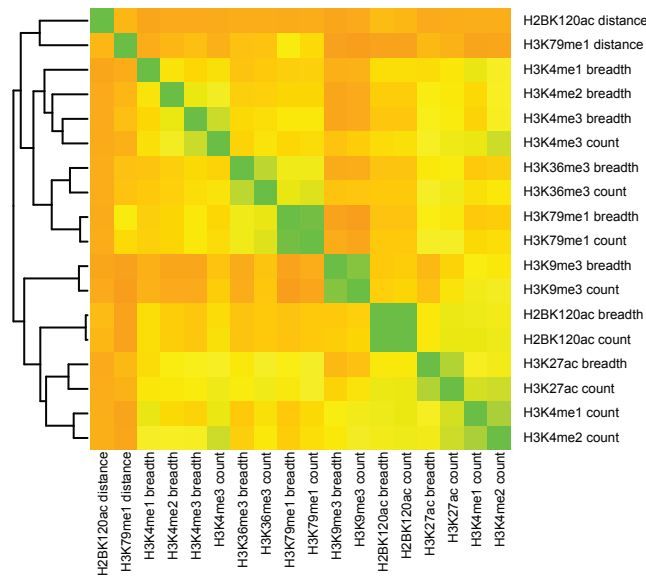

**B** Protein data feature correlations (hESCs)

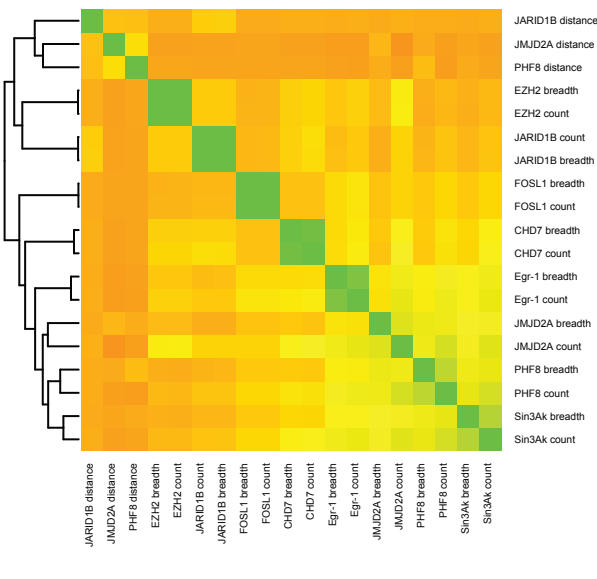

**C** Protein+Epigenetic data feature correlations (hESCs)

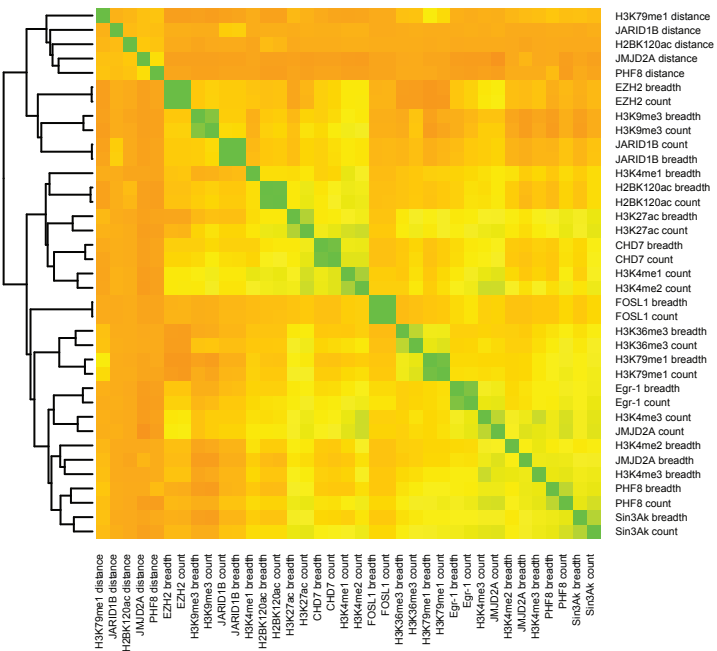

**D** Epigenetic data feature correlations (mESCs)

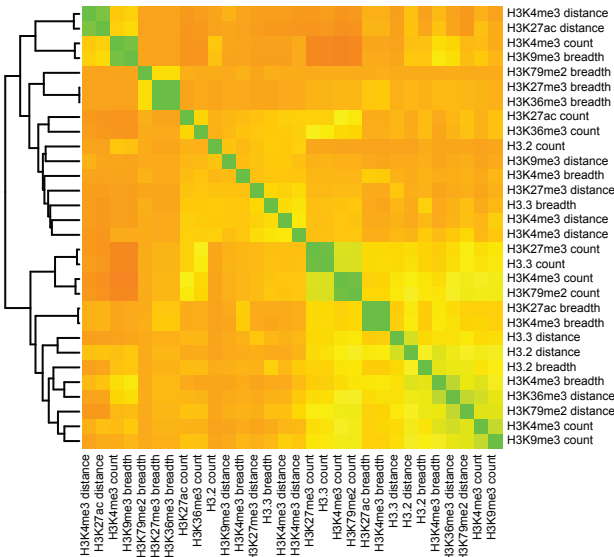

**E** Protein data feature correlations (mESCs)

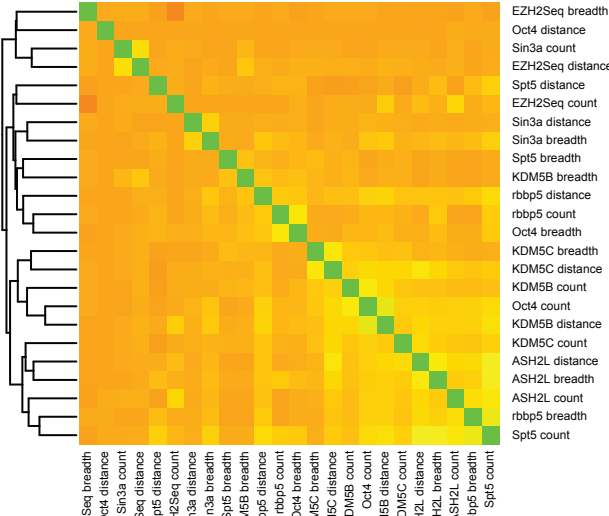

**F** Protein+Epigenetic data feature correlations (mESCs)

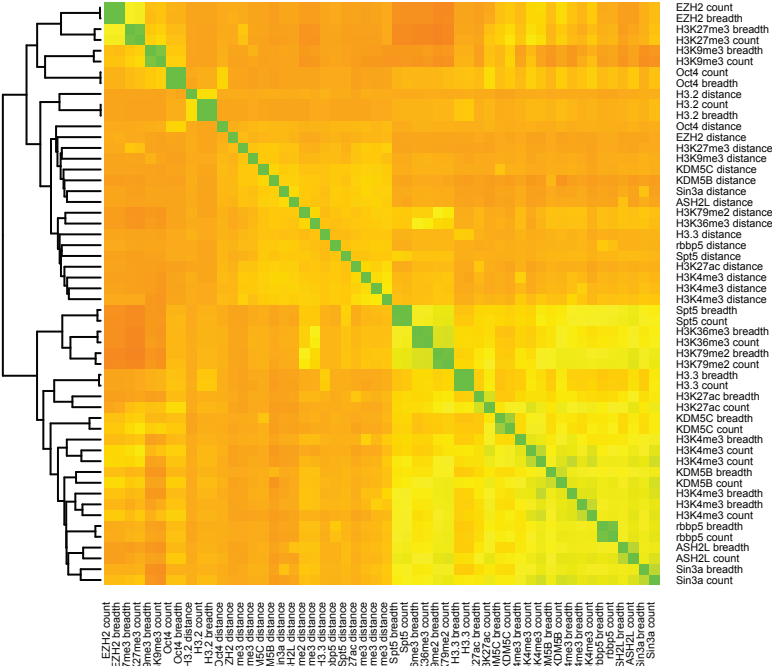

Spearman Correlation Coefficient

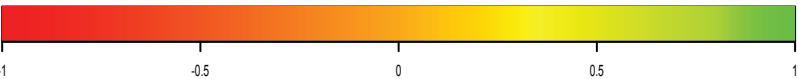

Supplement: Additional file 3: Figure S2. — Epigenetic and protein binding dataset correlations. Correlations between a subset of epigenetic and protein binding data features (assessed by Spearman correlation coefficient) indicate that certain datasets and features are highly correlated with each other in human (A-B-C) and mouse (D-E-F) embryonic stem cells. (PDF 11059 kb) [file 13062_2016_148_MOESM3_ESM.pdf]
